# Supplementary material
Source: PubMed Central journal article supplement (PMC3715143)

## **SUPPLEMENTAL FIGURE LEGENDS**

### **Supplemental Figure S1. Normal Small Intestine DC Numbers and DC Activation Marker Levels, but Enlarged Small Intestine Morphology in TRAF6 $\Delta$ DC Mice**

**(A)** Representative 27 week-old control (WT) and TRAF6 $\Delta$ DC ( $\Delta$ DC) intestines. **(B)** Mesenteric lymph nodes harvested from 30 week-old TRAF6 $\Delta$ DC ( $\Delta$ DC) compared to littermate control (WT). **(C)** Lamina propria DCs were isolated from small intestine. FACS plots gated on DC markers (CD11c<sup>+</sup> and MHC Class II<sup>+</sup>) show subpopulations of DCs (n=5). FACS plots and histogram data (mean  $\pm$  SD, standard deviation) are representative of at least 3 independent experiments. **(D)** Surface marker expression on CD11c<sup>+</sup>-gated DCs from TRAF6 $\Delta$ DC gut versus littermate controls. Figure S1, related to Figures 2 and 3.

### **Supplemental Figure S2. Goblet Cell Hyperplasia in TRAF6 $\Delta$ DC Small Intestines**

Alcian blue and RELM- $\beta$  staining of the ileum sections of small intestine from TRAF6 $\Delta$ DC and littermate control (WT, 27 weeks old) mice. The histogram data (mean  $\pm$  SD) showing goblet cell counts were analyzed with two-tailed, unpaired Student's t-tests. Arrows, goblet cells. Arrowheads, Paneth cells. Scale bars, 300  $\mu$ m. Figure S2, related to Figure 2.

### **Supplemental Figure S3. TRAF6 $\Delta$ DC Colonic Tissue Exhibits Normal Immune Homeostasis**

**(A)** Trichrome staining of colon sections from TRAF6 $\Delta$ DC and littermate control mice (27 weeks old). **(B)** Fold increases in pro-fibrotic (Acta2 and Igf-1), anti-fibrotic (IFN- $\gamma$  and IL-12) markers and cytokines (IL-13, IL-5 and IL-4) in mRNA isolated from tissue of TRAF6 $\Delta$ DC ( $\Delta$ DC) colon were compared to littermate control mice ( $n \geq 4$ ;  $\geq 8$  week-old littermate groups). Scale bars, 100  $\mu$ m. Figure S3, related to Figure 2.

### **Supplemental Figure S4. Disease Mitigation in both TRAF6 $\Delta$ DC.SCID Mice and Antibiotics-treated TRAF6 $\Delta$ DC Mice**

**(A)** Fibrotic markers (Acta2 and Igf-1) mRNA expression levels in ileum tissues of small intestine from TRAF6 $\Delta$ DC and littermate control mice were measured on 20 week-old C57BL/6 background or SCID background. The histograms (mean  $\pm$  SD) are representative of 3 separate experiments. Data were analyzed by one-way ANOVA with Tukey's post-test of multiple comparisons. **(B)** Intestines of representative 20 week-old control (WT) and TRAF6 $\Delta$ DC (T6 $\Delta$ DC) mice kept on full-spectrum antibiotic (Abx) treatment for the final 6 weeks. Figure S4, related to Figures 2 and 4.

### **Supplemental Figure S5. No Major Differences in Taxonomy of Fecal Bacteria Detected in MyD88 $\Delta$ DC or TRAF6 $\Delta$ DC Mice**

Heatmap analysis shows relative abundance of taxa as a percentage of total 16S rRNA, organized according to genus or most specific assigned taxon. Color scales reflect proportion contributed by each taxon. C#, Wild type control; M#, MyD88 $\Delta$ DC; T6#, TRAF6 $\Delta$ DC; 6wk, 6 weeks old; 20wk, 20 weeks old. (e.g., T64.20wk is 20 week-old TRAF6 $\Delta$ DC mouse, replicate #4). Community analysis using a weighted UniFrac metric (phylogenetic distance) did not show significant differences between controls, TRAF6 $\Delta$ DC, and MyD88 $\Delta$ DC when tested at either week 6 or week 20. The MyD88 $\Delta$ DC samples did show separation when distances were measured by unweighted UniFrac or by the Jaccard metric (non-phylogenetic), indicating that this genotype had a measurable effect on less abundant species (see supplemental sequencing report). Figure S5, related to Figure 5.

#### **Supplemental Figure S6. Normal Treg Cell Population in MyD88 $\Delta$ DC Mice**

FACS plots gated on CD4<sup>+</sup> T cells show intracellular staining from small intestinal lamina propria from 6-8 week-old MyD88 $\Delta$ DC mice, and Foxp3<sup>+</sup> as percentages of CD4<sup>+</sup> populations as well as cell counts. FACS plots are representative of 5 independent experiments. Data were analyzed with two-tailed, paired Student's t-tests. N.S., not significant. Figure S6, related to Figure 6.

#### **Supplemental Figure S7. Normal Expression by TRAF6 $\Delta$ DC Lamina Propria DCs of Treg Cell-Associated Markers**

DCs were purified from control (WT) and TRAF6 $\Delta$ DC ( $\Delta$ DC) small intestine lamina propria using anti-CD11c MACS, and then Q-PCR analysis of Treg cell-associated genes performed on cDNAs prepared from DCs. The histograms are representative of at least 3 separated experiments and represented as mean  $\pm$  SD. Student's t-test comparison revealed no statistical difference between control and TRAF6 $\Delta$ DC for each target gene assayed. Figure S7, related to Figure 6.

### **Supplemental Figure S8. Requirement for DC-expressed IL-2 for Optimal iTreg Cell Induction**

**(A)** Representative FACS plots (left panels) and aggregate counts (right panel) of Foxp3<sup>+</sup> cells converted from naïve/effector OT-II CD4<sup>+</sup> T cells after 4 days culture with purified lamina propria DCs ( $5 \times 10^4$  T cells per  $5 \times 10^3$  DCs), 1  $\mu$ M OVA 323-339, and 1 ng/ml TGF- $\beta$ , in the presence or absence of 1  $\mu$ g/ml anti-IL-2 neutralizing antibody ( $\alpha$ IL-2). \*\*,  $p < 0.01$ . **(B)** Representative FACS plots (left panels) and aggregate counts (right panel) of Foxp3<sup>+</sup> converted from naïve/effector OT-II CD4<sup>+</sup> T cells after 4 days culture with purified lamina propria DCs ( $5 \times 10^4$  T cells per  $5 \times 10^3$  DCs) harvested from either control (IL-2<sup>+/+</sup>) or IL-2 knockout (IL-2<sup>-/-</sup>) mice, plus 1  $\mu$ M OVA 323-339, and 1 ng/ml TGF- $\beta$ . \*\*,  $p < 0.01$ . **(C)** Representative FACS plots (left panels) and aggregate counts (right panel) of Foxp3<sup>+</sup> donor cells recovered from mesenteric lymph nodes of either RAG2<sup>KO</sup> (IL-2<sup>+/+</sup>) or IL-2/RAG2<sup>DKO</sup> (IL-2<sup>-/-</sup>) recipient mice 6 days after adoptive transfer of naïve congenic OT-II CD4<sup>+</sup> T cells with OVA-feeding on each of the

last 5 days. The histograms are represented as mean  $\pm$  SD. Data were analyzed with two-tailed, paired Student's t-tests. Figure S8, related to Figure 7.

## **SUPPLEMENTAL EXPERIMENTAL PROCEDURES**

### **Cell Isolation**

For small intestinal lamina propria lymphocyte (LPL) isolation, epithelial cells were removed by incubation in stripping RPMI-1640 medium containing 10% FBS, 5 mM EDTA, 1 mM DTT, and 20 mM HEPES at 37 °C for 15 min in an orbital shaker. The remaining pieces were minced and incubated in serum-free RPMI-1640 medium containing 52 U/ml Liverase TM (Roche), 50  $\mu$ g/ml DNaseI (Sigma), and 20 mM HEPES at 37 °C for 15 min while shaking. Flow cytometry was performed after staining for surface marker antibodies.

### **Histology and Immunohistochemistry**

Intestinal specimens were cut longitudinally and Swiss-rolled inside out. Paraffin-embedded sections were performed after fixation in 10% Formalin solution (Fisher diagnostics). Alcian blue staining or Trichrome staining was performed by the Penn Center for Molecular Studies in Digestive and Liver Diseases.

Trichrome staining was used for staining muscle, cytoplasm, and collagen.

Immunohistochemistry was performed by using  $\alpha$ -RELM- $\beta$  antibody, followed by DAB staining.

## **Quantitative PCR**

Tissues were homogenized in TRIzol (Invitrogen) after freezing in liquid nitrogen. cDNA was generated using Superscript III (Invitrogen) and random hexamer (Qiagen). TaqMan gene probes were used with TaqMan Universal PCR Master Mix (Applied Biosystems) and run on 7300 Realtime PCR System (Applied Biosystems): 2 min at 50 °C, 10 min at 95 °C, 50 cycles of 15 sec 95 °C, 1 min at 60 °C, and signals were detected during the annealing step (60 °C). Relative mRNA expression levels of all samples were normalized to 18S mRNA.

## **Fecal Bacteria Taxonomic Analysis**

The deep sequencing studies of bacterial composition, including DNA isolation, amplification, sequencing, and sequence analysis, were performed by the Bushman lab (microbiology, UPENN) as previously described (Wu et al.). Briefly, fecal pellets were processed with the PSP Spin Stool DNA Plus (1038110300, STRATEC Molecular, Berlin-Buch, Germany) kit according to manufacturer instructions, and after amplification of 16S rDNA genes, dilutions of broad-specificity V1V2 primers and template, as well as quadruplicate 25 µL PCR reaction assembly, were carried out with liquid-handling robot (epMotion 5075 LH, Eppendorf, Hamburg, Germany). Reactions were performed by AccuPrime Taq DNA Polymerase (12339-016, Invitrogen, Carlsbad, CA), pooled and purified using AMPure magnetic beads (A63881, Agencourt, Brea, CA), and sequencing

was performed by a 454 Life Sciences FLX instrument (06372279001, Roche, Branford, CT).

## **SUPPLEMENTAL REFERENCES**

Wu, G.D., Lewis, J.D., Hoffmann, C., Chen, Y.Y., Knight, R., Bittinger, K., Hwang, J., Chen, J., Berkowsky, R., Nessel, L., *et al.* Sampling and pyrosequencing methods for characterizing bacterial communities in the human gut using 16S sequence tags. *BMC Microbiol* 10, 206.

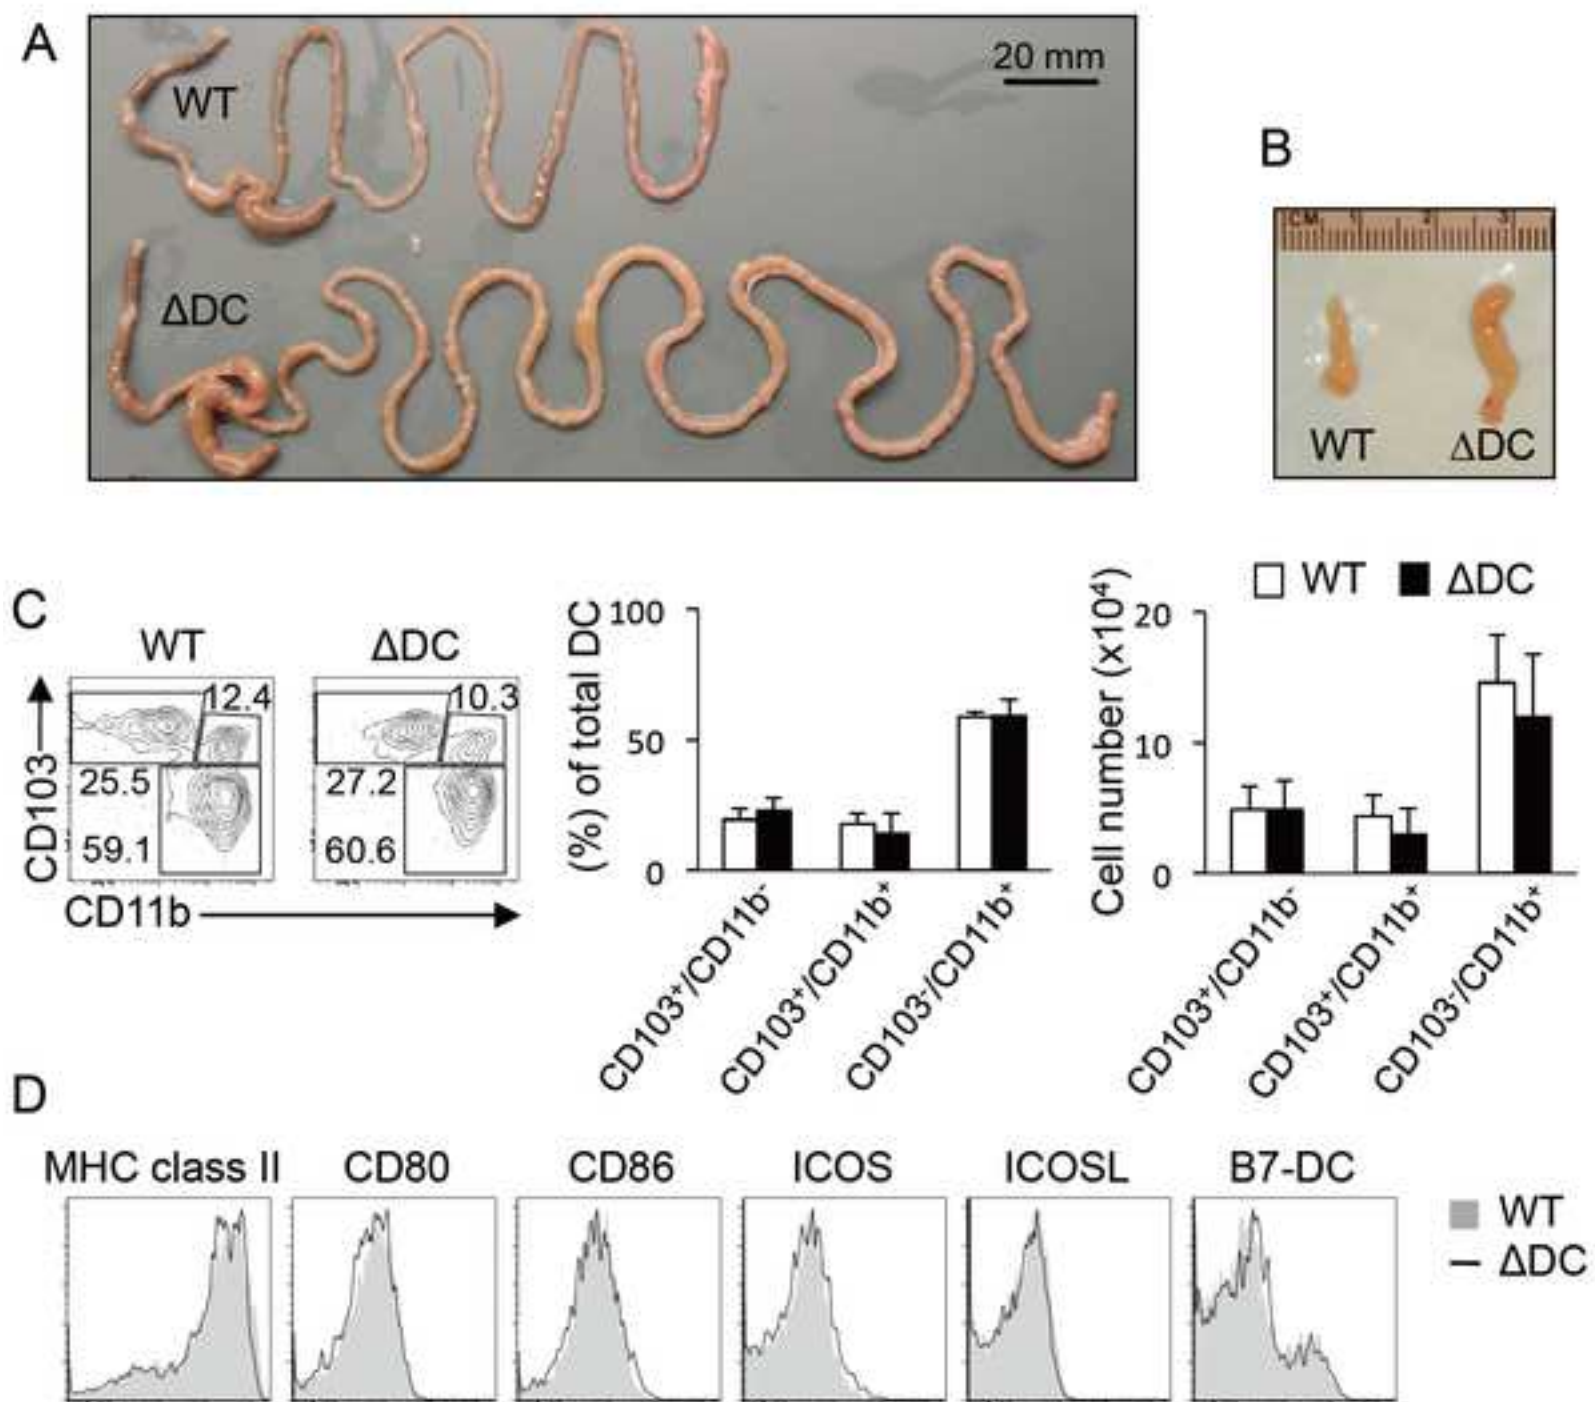

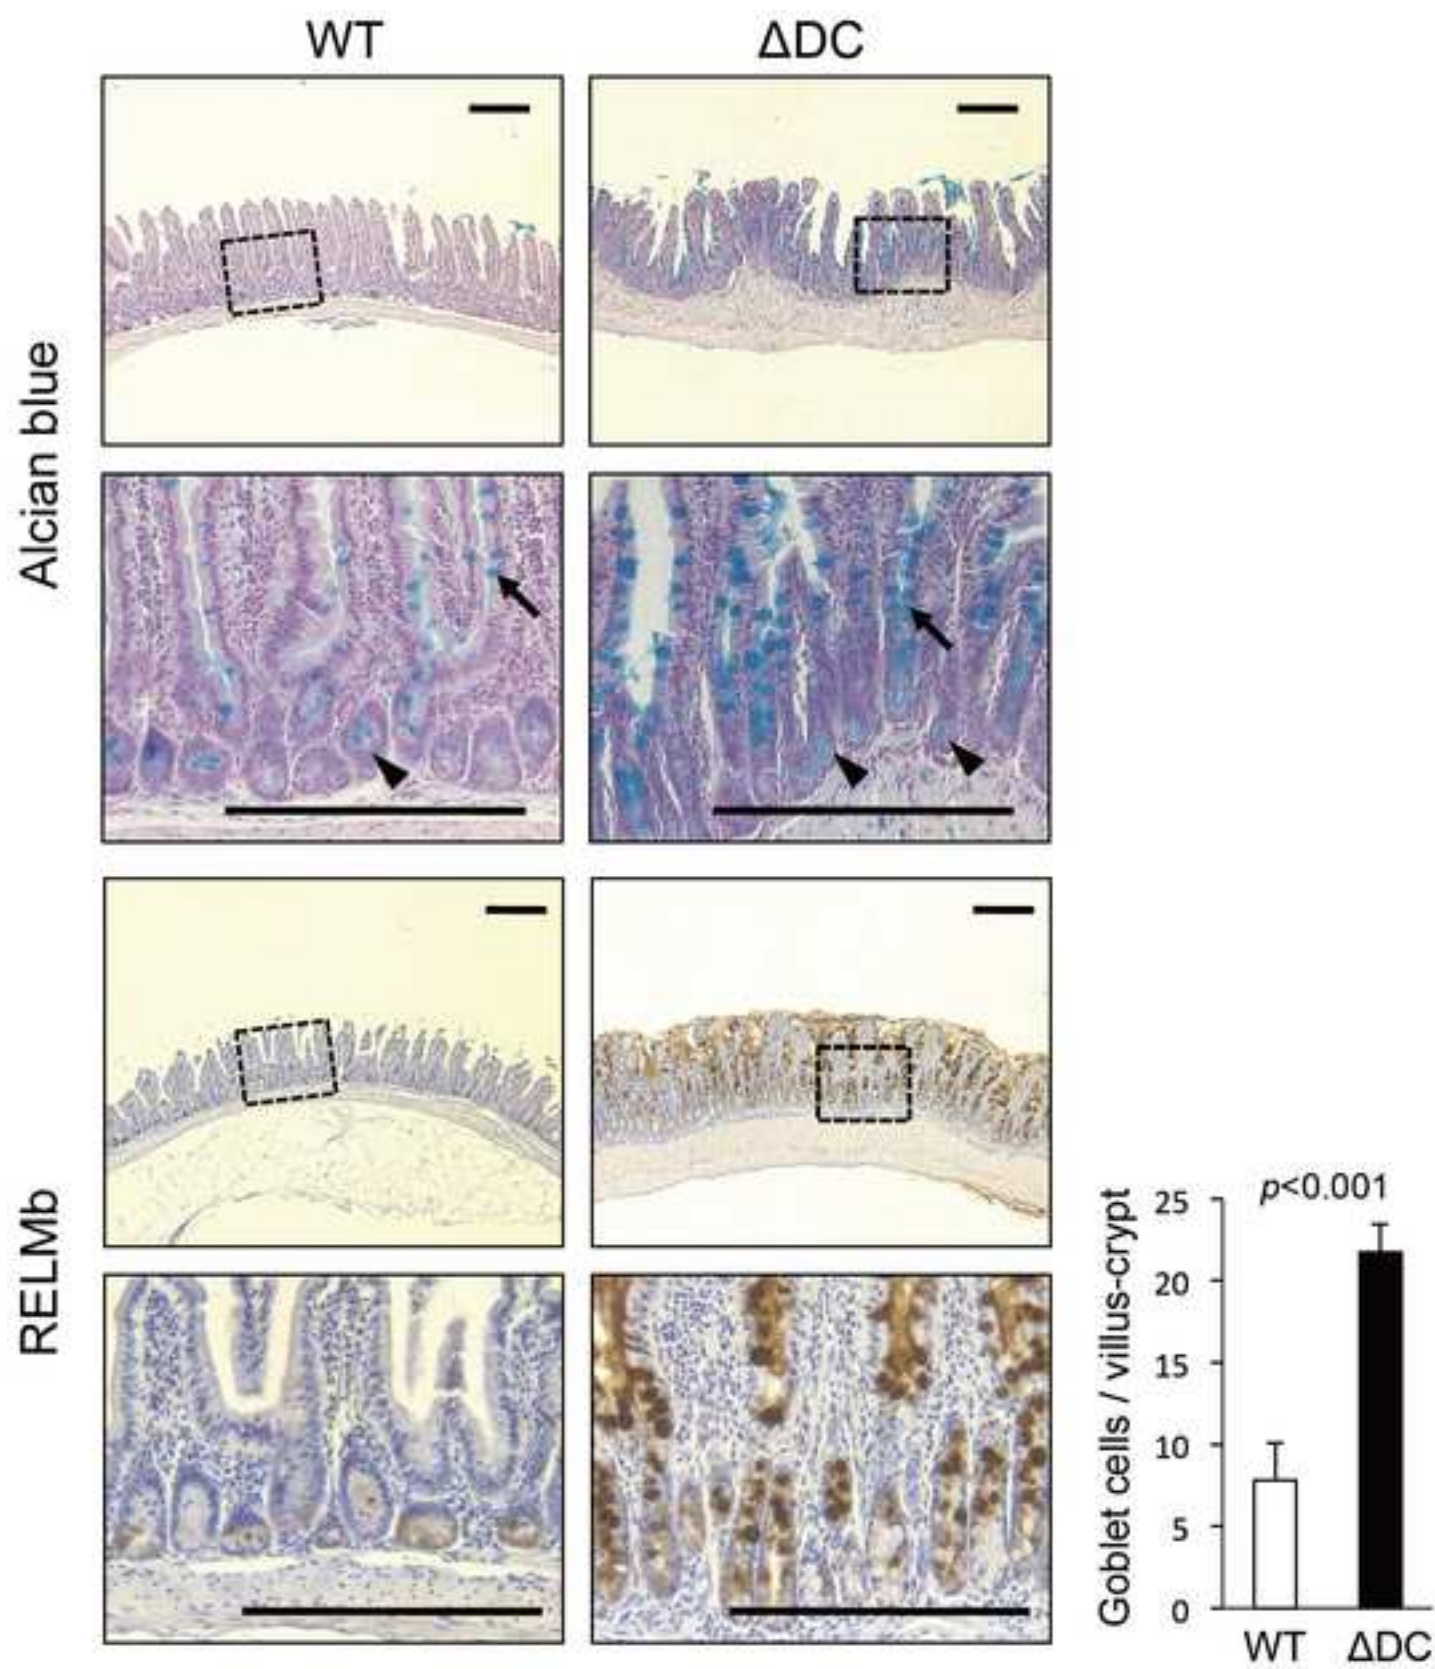

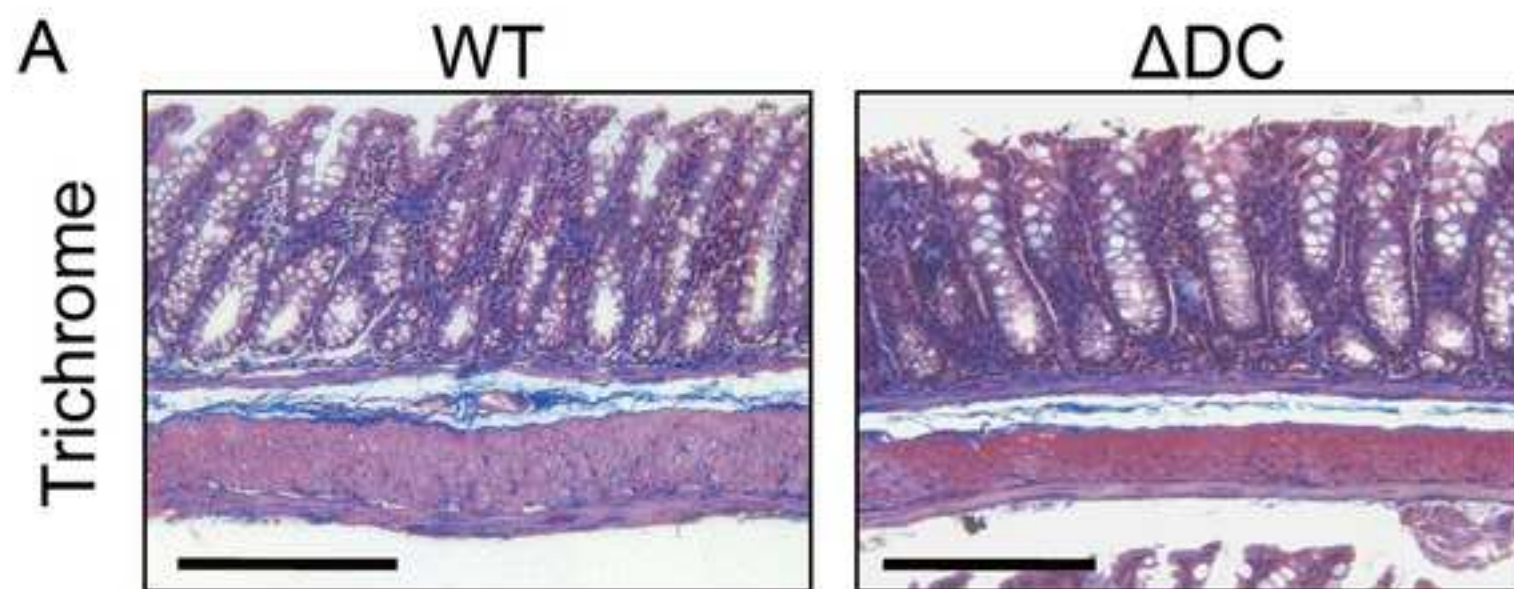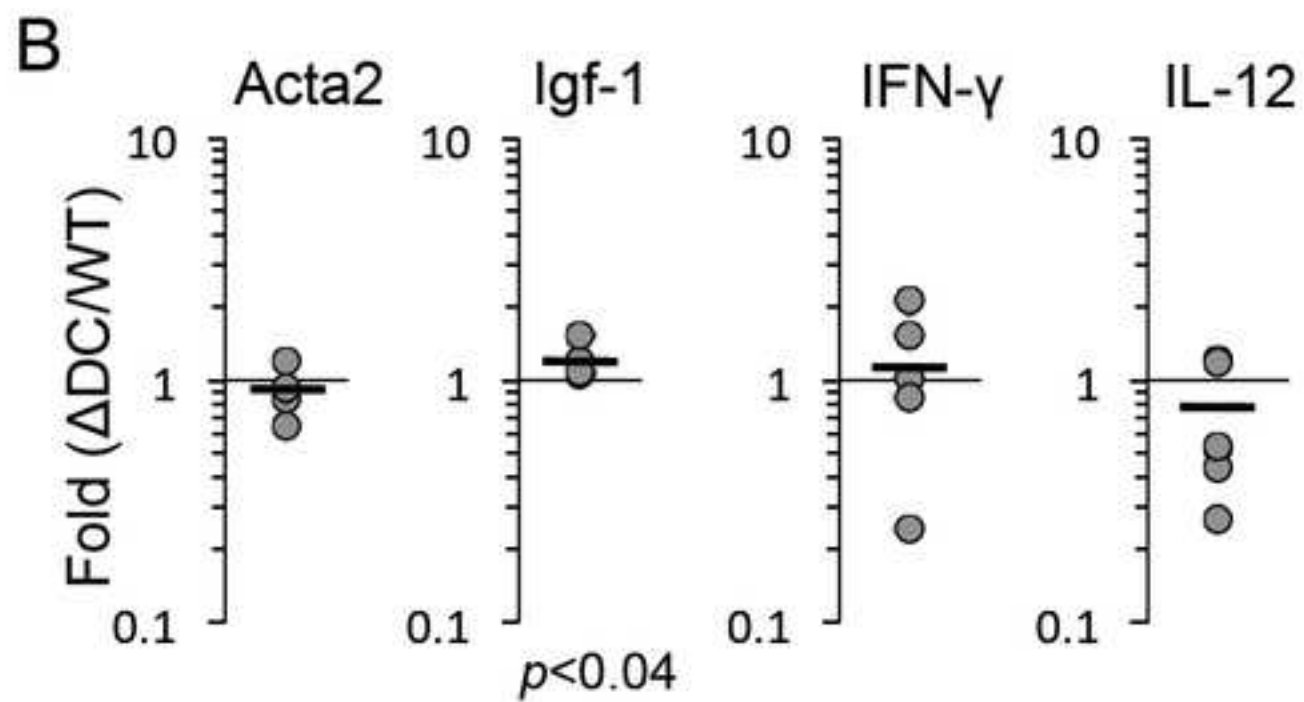

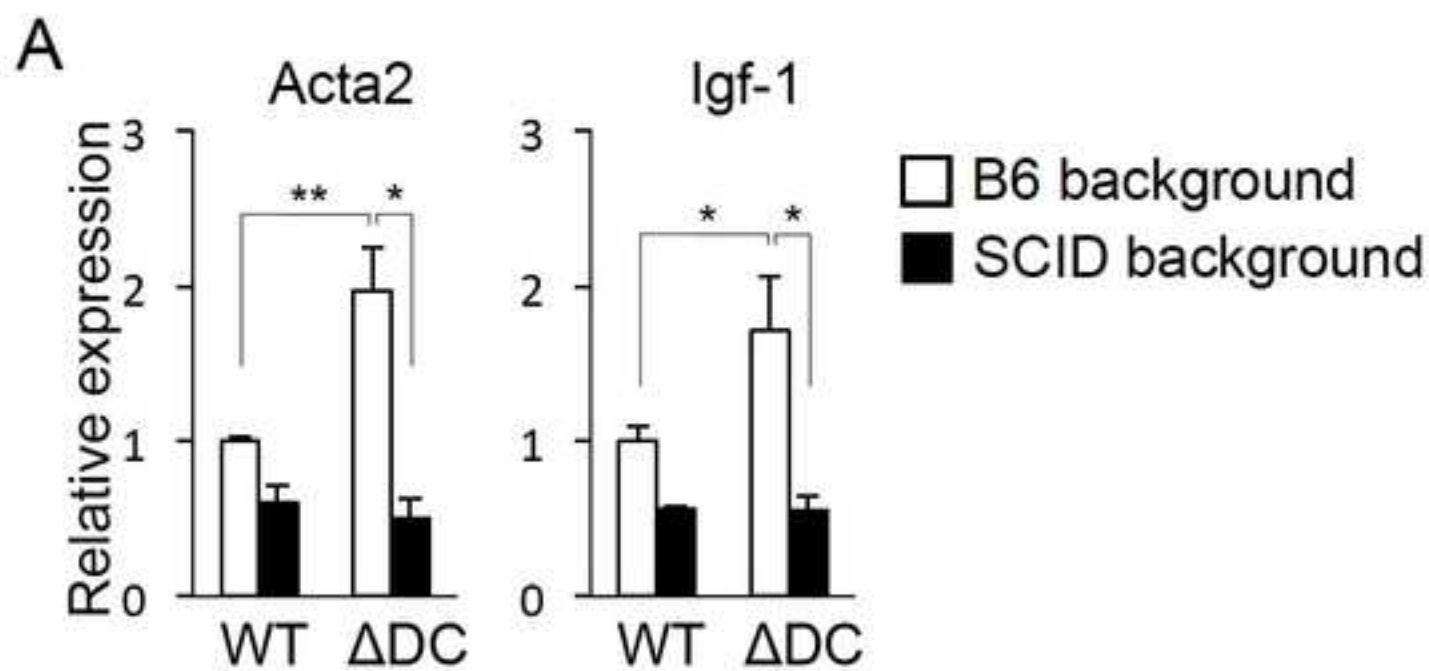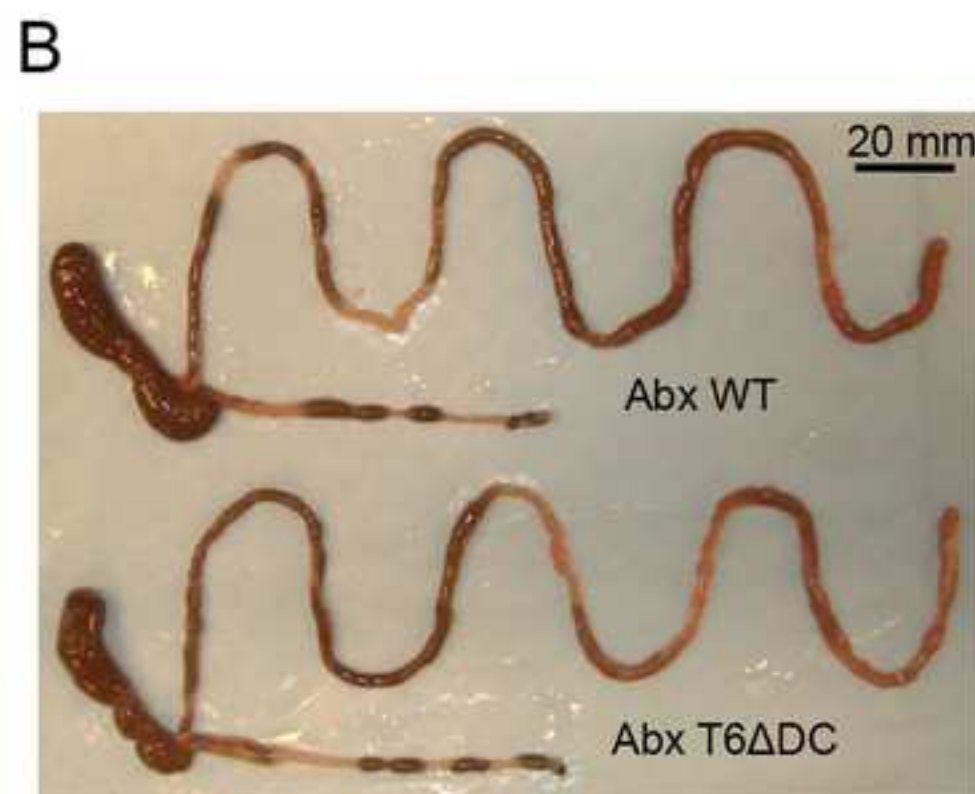

Supplemental Figure 5

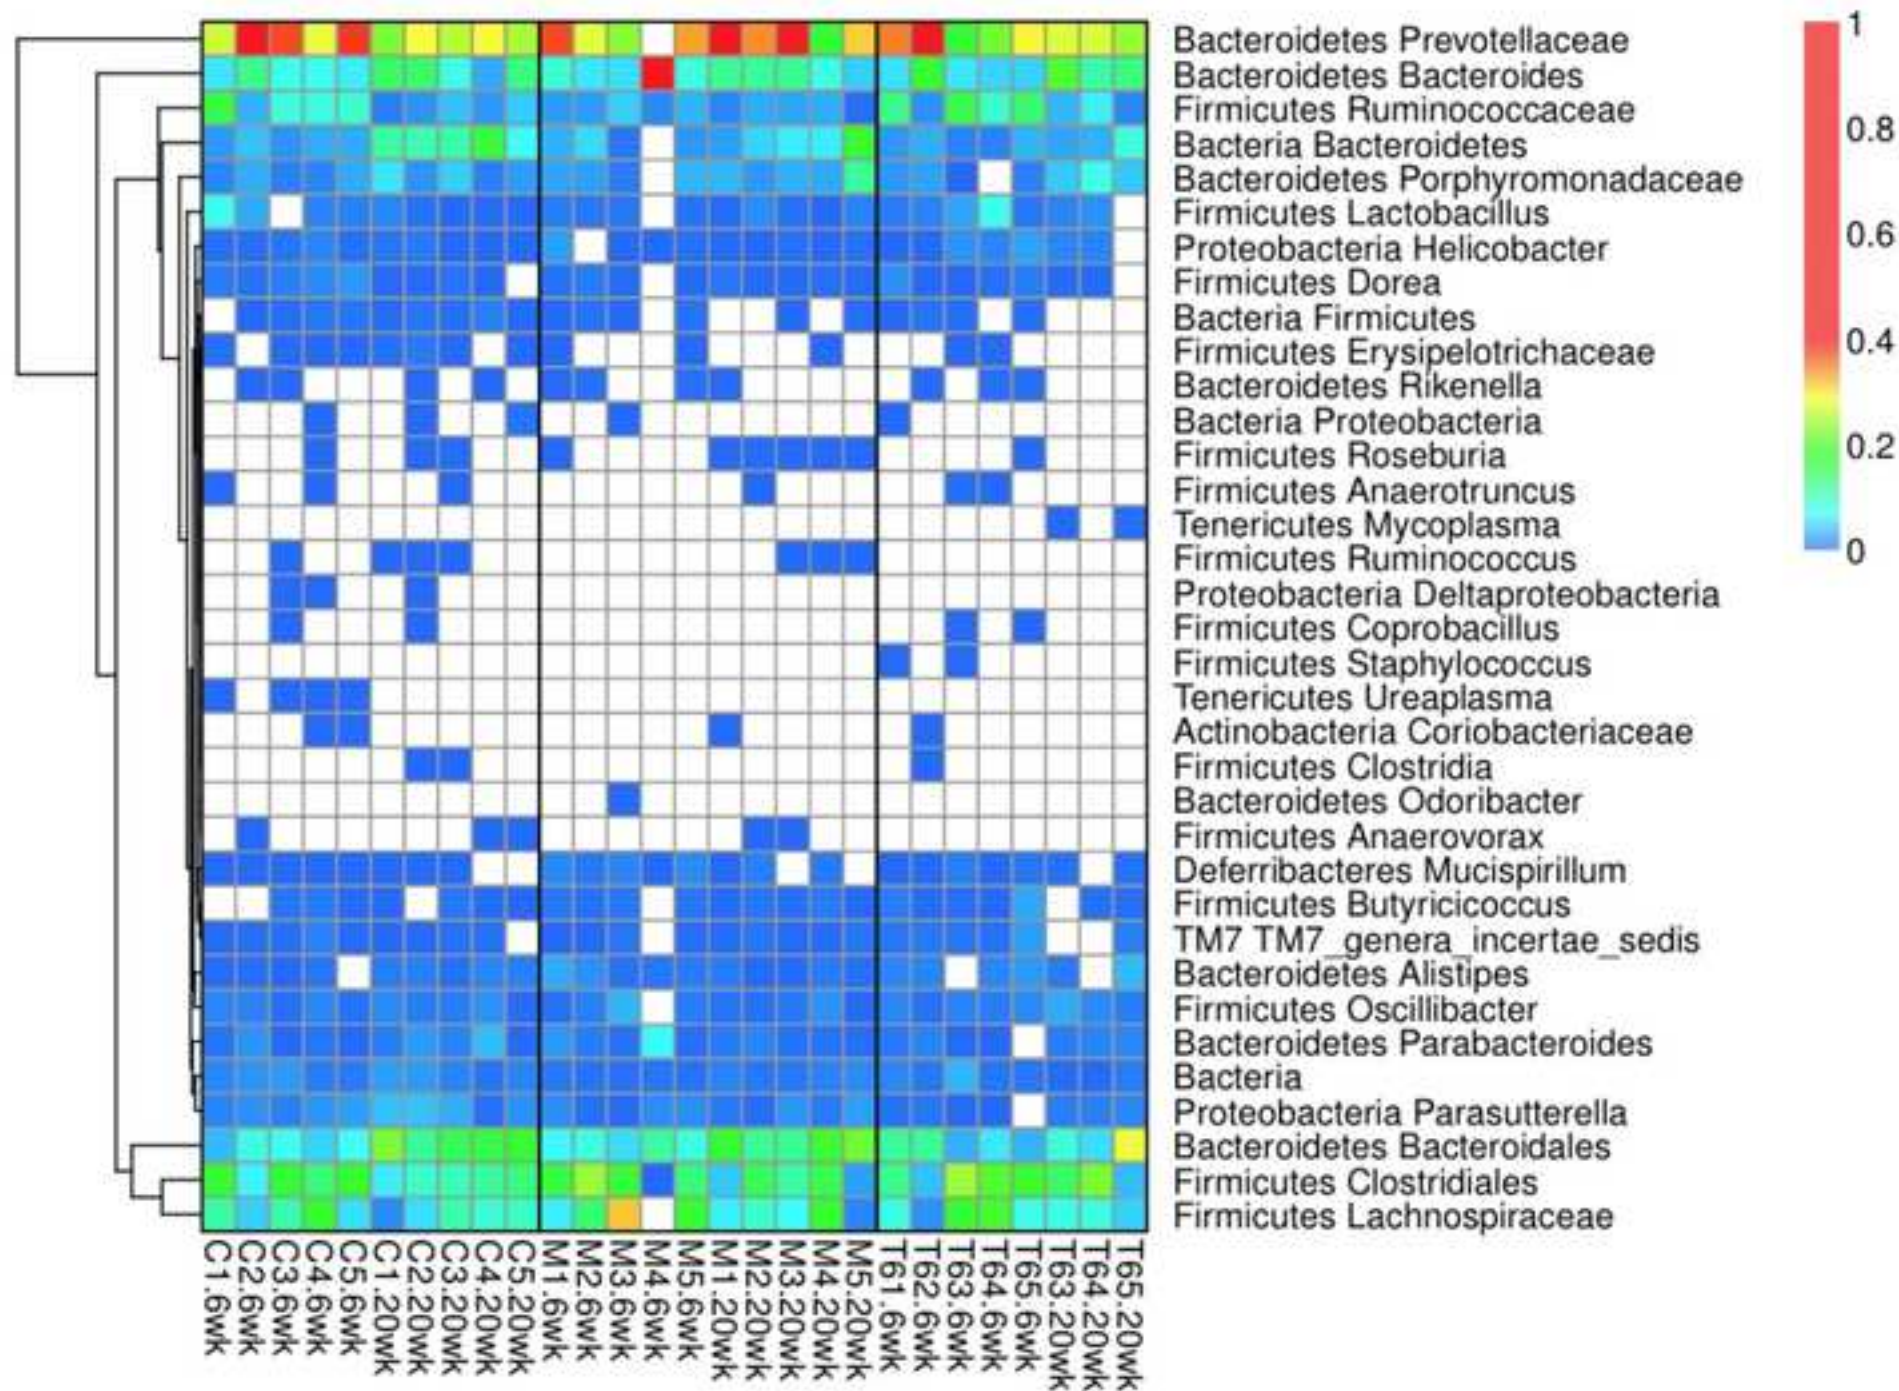

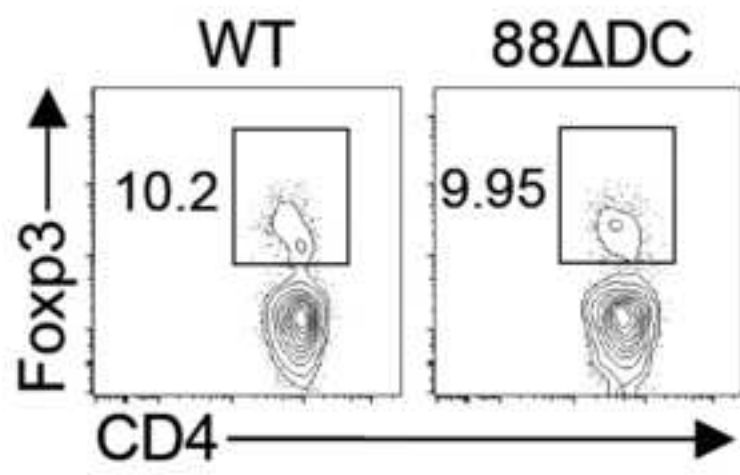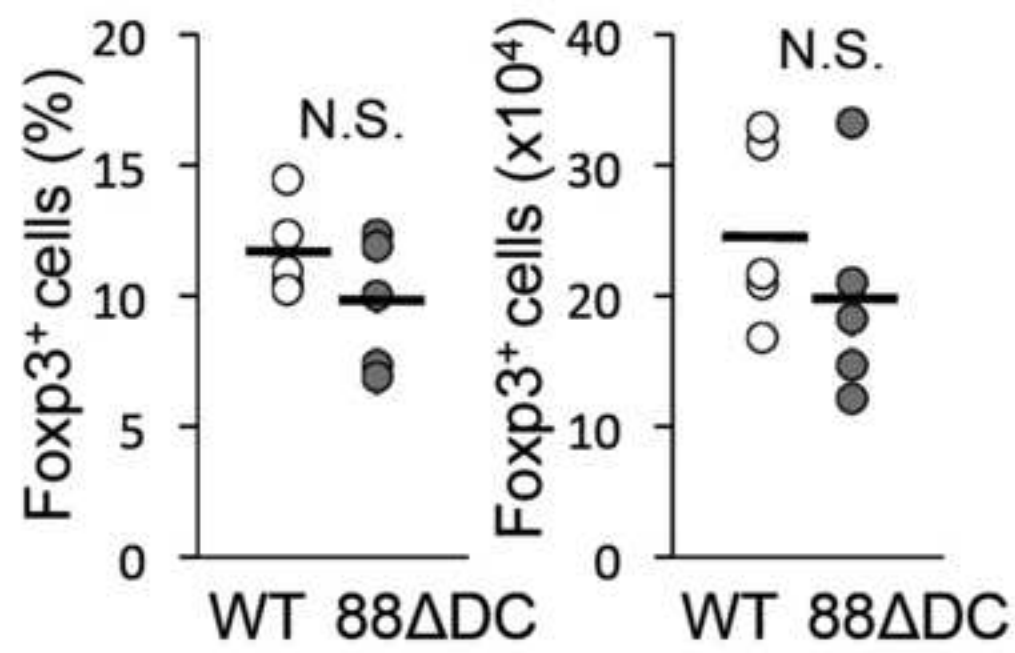

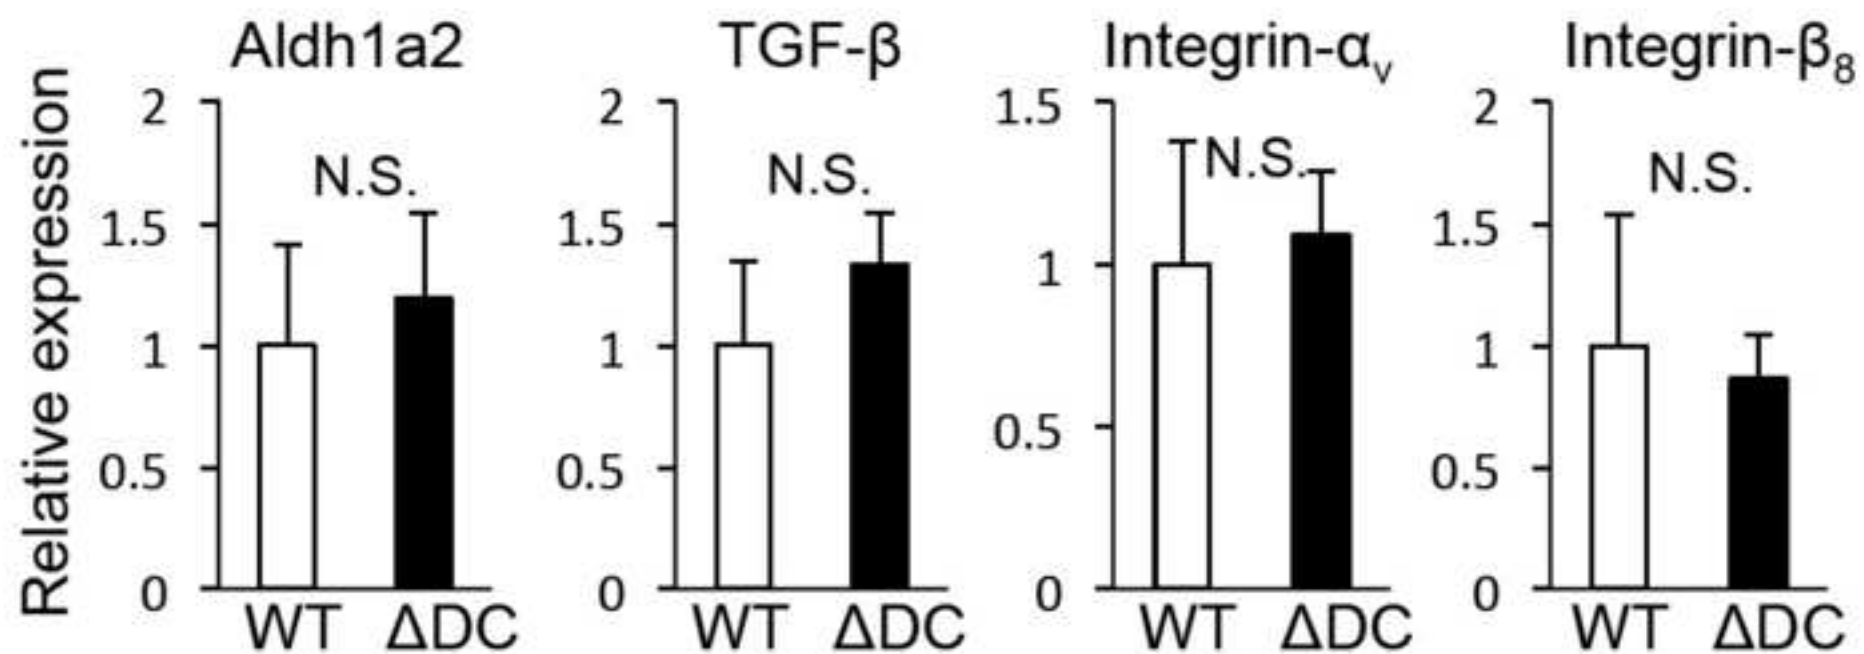

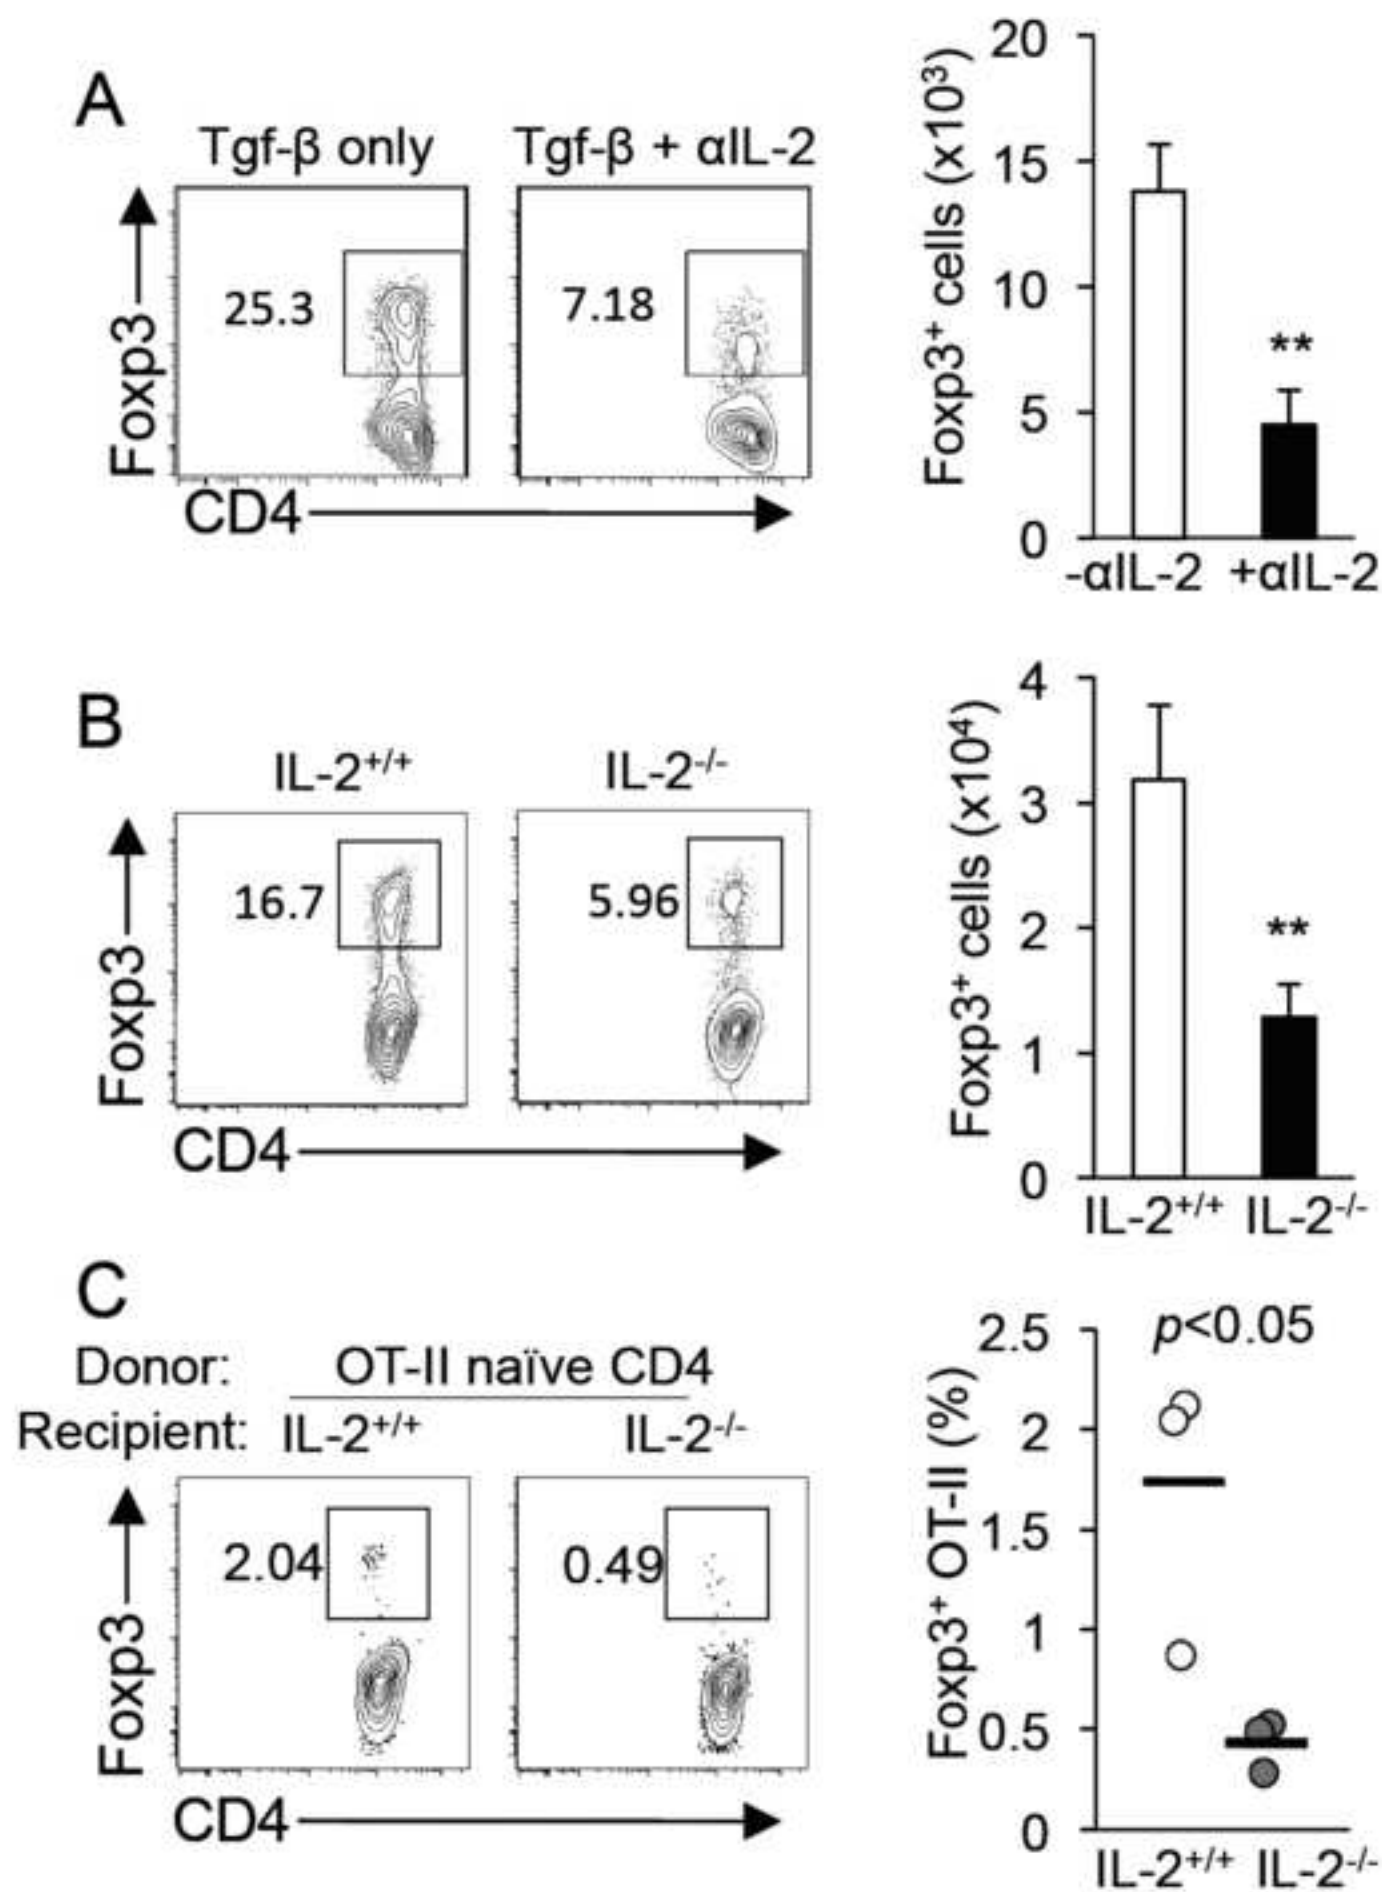

Supplement: NIHMS487874-supplement-01.pdf [file NIHMS487874-supplement-01.pdf]
